# Supplementary material for: GPRC6A as a novel kokumi receptor responsible for enhanced taste preferences by ornithine
Source: eLife. 2025 May 1;13:RP101629. doi: 10.7554/eLife.101629 (PMC12045618; doi:10.7554/eLife.101629)
Supplement: Figure 1—source data 1. [file elife-101629-fig1-data1.xlsx]

## Sheet: Figure 1A
	Two bottle preference test (g/day): distilled water (DW) vs. ornithine (Orn)
				0.3mM			1mM			3mM			10mM			30mM
			DW	Orn		DW	Orn		DW	Orn		DW	Orn		DW	Orn
	Rat #1		16.1	18		11.9	13		12.5	13.5		7.9	25.8		13.7	16.8
	Rat #2		12.1	15		8.2	18.2		7.4	16.6		4.4	20.2		6.1	17.6
	Rat #3		10.1	16.7		11.6	13.1		19.5	11.4		13.4	18.5		6.4	29.1
	Rat #4		12.4	14.1		10.9	15.8		14.4	16.1		7.5	20.9		14.1	15.1
	Rat #5		20.2	7		9.4	17.6		2.2	25		12.7	16.9		3.3	26.1
	Rat #6		11.9	9.8		17.2	17.2		7.5	14.7		5.9	17.7		9.3	16.1

## Sheet: Figure 1B
	Two bottle preference test (g/day): 0.03 M monosodium glutamate (MSG) vs. 0.03 M MSG+ornithine (Orn)
			MSG	MSG in		MSG	MSG in		MSG	MSG in		MSG	MSG in		MSG	MSG in
				0.3mM Orn			1mM Orn			3mM Orn			10mM Orn			30mM Orn
	Rat #1		18	37.8		5.4	35		11.7	49		5	53.5		4.9	50.3
	Rat #2		16.2	22.4		8.1	26.2		13.3	38.9		7.4	40		6.2	34.7
	Rat #3		13.1	22.6		8.1	27.4		23.3	20		3	31.1		13.2	33.2
	Rat #4		14.8	17.5		8.5	31.1		7.8	36.6		7.9	34.5		9.6	31
	Rat #5		22.6	11.6		10.3	25.5		8.3	34.4		6.9	38.2		5.8	32
	Rat #6		14.8	19.7		14.6	37.6		15.9	21.9		3.7	36.3		5.6	34
