# Supplementary material for: GPRC6A as a novel kokumi receptor responsible for enhanced taste preferences by ornithine
Source: eLife. 2025 May 1;13:RP101629. doi: 10.7554/eLife.101629 (PMC12045618; doi:10.7554/eLife.101629)
Supplement: Figure 2—figure supplement 1—source data 1. [file elife-101629-fig2-figsupp1-data1.xlsx]

## Sheet: Fig. 2 Supple
	Effects of addition of three concentrations of ornithine to miso soup on three kokumi attributes and palatability in humans (n = 22)
		Intensity of taste				Mouthfulness				Persistence of taste				Palatability
		control	1mM Orn	3mM Orn	10mM Orn	control	1mM Orn	3mM Orn	10mM Orn	control	1mM Orn	3mM Orn	10mM Orn	control	1mM Orn	3mM Orn	10mM Orn
	#1	0	-2	-1	2	0	-1	1	1	0	-1	1	2	0	-1	0	1
	#2	0	0	0	0	0	-1	0	1	0	-1	0	0	0	0	0	0
	#3	0	0	2	1	0	-1	1	0	0	0	2	1	0	0	0	0
	#4	0	-2	1	0	0	-2	1	0	0	-2	1	0	0	-2	1	0
	#5	0	0	2	1	0	-1	0	0	0	-1	0	1	0	0	1	0
	#6	0	-1	-1	-1	0	-1	-1	-1	0	0	0	0	0	-1	-1	0
	#7	0	0	1	2	0	-1	1	2	0	1	1	2	0	0	1	1
	#8	0	1	0	1	0	1	0	2	0	2	-1	0	0	1	-1	1
	#9	0	1	0	1	0	1	2	2	0	0	1	2	0	1	0	1
	#10	0	0	-1	2	0	1	0	1	0	-1	0	2	0	0	-1	0
	#11	0	2	1	-2	0	2	2	0	0	0	-1	2	0	1	0	0
	#12	0	1	1	0	0	1	2	0	0	0	1	0	0	0	0	0
	#13	0	0	0	2	0	1	1	1	0	0	0	1	0	0	0	-1
	#14	0	0	1	1	0	0	0	0	0	0	1	1	0	-1	0	0
	#15	0	1	-1	0	0	0	1	1	0	0	0	1	0	0	0	0
	#16	0	2	2	1	0	1	1	0	0	1	2	1	0	1	2	1
	#17	0	-1	0	1	0	0	-1	1	0	1	1	0	0	0	1	0
	#18	0	-1	0	-1	0	0	1	-1	0	-2	-1	-1	0	-1	0	-1
	#19	0	0.3	0.3	0.4	0	0.1	0.4	0.4	0	0.3	0.2	0.4	0	0.1	0.3	0.6
	#20	0	0.1	0.3	0.4	0	0.1	0.3	0.4	0	0.1	0.5	0.6	0	0.1	0.2	0.5
	#21	0	0.3	0.8	0.9	0	0	0.6	0.6	0	0	0.7	0.8	0	-0.2	0.9	1
	#22	0	0.1	0.8	0.9	0	0.1	0.6	0.6	0	0.2	0.5	0.7	0	0.1	0.6	0.8
	Participants from #1 to #18 selected -2, -1, 0, +1, or +2 on the 5-point rating scale.
	Participants from #19 to #22 marked their evaluations at any point on the 5-point rating scale.
