# Supplementary material for: GPRC6A as a novel kokumi receptor responsible for enhanced taste preferences by ornithine
Source: eLife. 2025 May 1;13:RP101629. doi: 10.7554/eLife.101629 (PMC12045618; doi:10.7554/eLife.101629)
Supplement: Figure 2—source data 1. [file elife-101629-fig2-data1.xlsx]

## Sheet: Figure 2A
		Two bottle preference test: Fluid intake (g/day) with and without 1 mM ornithine (Orn)
	A
	IMP	0.001M			0.003M			0.01M			0.03M
		- Orn	+ Orn		- Orn	+ Orn		- Orn	+ Orn		- Orn	+ Orn
	Rat #1	20.3	11.2		2.5	32.4		11.2	38.3		18.4	13.5
	Rat #2	14.1	21.4		6	25.3		9.8	28.2		2.5	36.1
	Rat #3	24.1	17.2		10	25		15.7	36.1		4.7	30.1
	Rat #4	23	13.6		13.6	14.5		11.9	30.3		19.5	7.8
	Rat #5	4.1	30.9		12.8	24.7		16.5	16.2		21.7	19.9
	Rat #6	6.8	25.7		18.7	19.8		8.4	33.4		11	30.5
	Rat #7	3.6	25.9		8.1	23.9		23.7	19.2		7.4	27.2
	Rat #8	23.1	22.4		4.6	31.2		17.3	31.3		6.6	22.8

## Sheet: Figure 2B
		Two bottle preference test: Fluid intake (g/day) with and without 1 mM ornithine (Orn)
	B
	MSG	0.001M			0.003M			0.01M			0.03M
		- Orn	+ Orn		- Orn	+ Orn		- Orn	+ Orn		- Orn	+ Orn
	Rat #1	5.6	27		4.9	23.2		4.6	37.7		4.6	26.2
	Rat #2	6.5	26.2		8.3	28.9		4.2	41.2		5.1	37
	Rat #3	10.1	31.6		19.8	35.6		6.8	41.6		24.3	54
	Rat #4	4.3	27.5		6.9	16.9		8.4	37.9		3.6	18.3
	Rat #5	5.5	30.7		12.3	19.2		8.1	26.3		9.4	38.4
	Rat #6	9.3	27		14.5	43.1		4.8	30.8		22.6	62.7
	Rat #7	19.2	12.5		21.3	6		19.8	20.1		15.3	12.5
	Rat #8	5.4	33.4		8.3	37		14.9	44.4		6.2	44.8

## Sheet: Figure 2C
		Two bottle preference test: Fluid intake (g/day) with and without 1 mM ornithine (Orn)
	C
	MPG	0.001M			0.003M			0.01M			0.03M
		- Orn	+ Orn		- Orn	+ Orn		- Orn	+ Orn		- Orn	+ Orn
	Rat #1	3.1	27.5		5.3	34.9		3.3	33.2		8.6	33.7
	Rat #2	4.7	28.2		8.3	34.1		2.9	33.8		12.9	28.9
	Rat #3	3	30		6.1	38.9		3.7	34.7		16.3	29.3
	Rat #4	4.8	25.5		7	34		5.8	36.3		10.5	34.6
	Rat #5	17.3	10.5		10.8	26.8		8.6	30.2		16	21
	Rat #6	2.9	25.7		9.1	31.8		2.1	35.7		7.8	32.5
	Rat #7	17	7.7		8.5	32.6		27.4	8.3		7.7	31.1
	Rat #8	5	25.7		14.5	38.7		13	39.4		17.3	36.3

## Sheet: Figure 2D
		Two bottle preference test: Fluid intake (g/day) with and without 1 mM ornithine (Orn)
	D
	Intralipos	0.001			0.003			0.01			0.03
		- Orn	+ Orn		- Orn	+ Orn		- Orn	+ Orn		- Orn	+ Orn
	Rat #1	33.9	25.8		77.3	49.3		22	108.1		37.2	67.1
	Rat #2	17.3	24.8		36.9	65.3		8	105.9		37.6	50.5
	Rat #3	24.3	31.3		33.8	76.5		15.9	105.2		48.8	44.2
	Rat #4	25	17.4		26	85.8		51.8	71.3		29.9	78.2
	Rat #5	0.5	49.3		52.7	36.7		24.5	97.1		65.1	8
	Rat #6	22.2	10.6		27.4	76.5		28.6	72		21.5	62.6
	Rat #7	27.3	20.8		19.8	74.9		29.8	41		23.5	39
	Rat #8	22.6	26		39.4	105.1		64.9	113.3		76.8	47.4

## Sheet: Figure 2E
		Two bottle preference test: Fluid intake (g/day) with and without 1 mM ornithine (Orn)
	E
	Sucrose	0.01M			0.03M			0.1M			0.3M
		- Orn	+ Orn		- Orn	+ Orn		- Orn	+ Orn		- Orn	+ Orn
	Rat #1	16.1	14.1		13.4	38.9		27.5	67.5		14	66.3
	Rat #2	24.8	4.3		7.2	40.5		23.4	52.5		37.3	33.3
	Rat #3	3.6	35.7		33.3	29.5		23.8	74.3		2	60.8
	Rat #4	8.9	24.8		9.8	52.7		24.3	57.3		59	14.1
	Rat #5	32.9	3.8		7.5	51.2		6.3	87.2		14.2	39.4
	Rat #6	19.7	10.6		5.8	61.4		8.5	79.6		36.6	35.1
	Rat #7	23.2	9.7		6.4	41.2		42.6	31.1		61.2	10.1
	Rat #8	3.7	29.4		13.2	47		35.6	57.8		21.8	62.5

## Sheet: Figure 2F
		Two bottle preference test: Fluid intake (g/day) with and without 1 mM ornithine (Orn)
	F
	NaCl	0.003M			0.01M			0.03M			0.1M
		- Orn	+ Orn		- Orn	+ Orn		- Orn	+ Orn		- Orn	+ Orn
	Rat #1	16.1	13.9		9.9	17.5		10	18.2		13.2	21.8
	Rat #2	17.1	9.4		13.4	14.4		22.4	6.9		28.9	2.9
	Rat #3	7.8	27.2		12.3	17.3		18	14.6		1.4	35.4
	Rat #4	8.9	23.4		10.5	23.3		15.2	18		28	5.8
	Rat #5	22.7	9.4		8	19.5		26.4	2.3		26	10.1
	Rat #6	4.9	24.9		7.6	18.6		9.6	21.8		18.3	14.2
	Rat #7	18.5	15.4		5	25.9		13.3	19.5		22.9	14.9
	Rat #8	11.3	29.8		24.2	24.9		19.8	25.5		2	31.7

## Sheet: Figure 2G
		Two bottle preference test: Fluid intake (g/day) with and without 1 mM ornithine (Orn)
	G
	Citric acid	0.0003M			0.001M			0.003M			0.01M
		- Orn	+ Orn		- Orn	+ Orn		- Orn	+ Orn		- Orn	+ Orn
	Rat #1	15.1	14.9		12.7	15.1		16.9	8.5		14.6	6.2
	Rat #2	20.8	8.4		11	17.7		10.5	13.6		5.7	14.9
	Rat #3	12.5	25		20.1	16.3		11	13.4		14.2	5.8
	Rat #4	13	22.2		17.7	12.5		12.3	12.3		15	6.3
	Rat #5	15.6	16.6		18.3	11.2		11.6	9.6		6.1	10.3
	Rat #6	19.3	12		18.2	9.9		8.8	20.7		10.2	13.8
	Rat #7	18.7	15.8		18.5	14.1		13.8	15.6		10.6	10.1
	Rat #8	12.9	26.2		19	14.8		16.4	16.3		17.1	11.7

## Sheet: Figure 2H
		Two bottle preference test: Fluid intake (g/day) with and without 1 mM ornithine (Orn)
	H
	QHCl	0.00001M			0.00003M			0.0001M			0.0003M
		- Orn	+ Orn		- Orn	+ Orn		- Orn	+ Orn		- Orn	+ Orn
	Rat #1	6.2	25.2		4.4	21.5		4.3	21.9		8.1	18
	Rat #2	24.2	7		19	8.7		4.9	18.5		4.7	19
	Rat #3	3.4	34.6		2.7	34.4		4.1	28		16.4	12.1
	Rat #4	17.8	12.1		8.9	20.7		4.3	25.5		7.1	19.7
	Rat #5	18.4	12.3		8.3	24.7		2.7	26		1.1	26.6
	Rat #6	3.3	26.9		3.2	26.3		2.2	23.9		0.4	25
	Rat #7	5.4	30.7		12.3	21.5		5.3	26.5		1	26.3
	Rat #8	4.6	30.8		4	29.1		5.6	29		18.3	8.6
