# Supplementary material for: GPRC6A as a novel kokumi receptor responsible for enhanced taste preferences by ornithine
Source: eLife. 2025 May 1;13:RP101629. doi: 10.7554/eLife.101629 (PMC12045618; doi:10.7554/eLife.101629)
Supplement: Figure 3—figure supplement 1—source data 1. [file elife-101629-fig3-figsupp1-data1.xlsx]

## Sheet: Fig. 2 SupplA-E
	Two bottle preference test: Fluid intake (g/day) with and without 1 mM ethyl gallate and effects of 100uM EGCG.
		A			B			C			D			E
		Water			0.03M MSG			0.03M MSG			0.01mM QHCl			0.01mM QHCl
		- gallate	+ gallate		- gallate	+ gallate		- gallate	+ gallate		- gallate	+ gallate		- gallate	+ gallate
								100uM EGCG						100uM EGCG
	Rat #1	13.1	14.2		10.1	18.9		11.9	11.3		4.7	23.2		5.7	20.3
	Rat #2	12.2	15.3		11.6	16.6		24.6	5.2		16.7	8.4		14.9	10
	Rat #3	10.8	18.3		7.4	21.8		7.3	24.4		7.5	26.6		6.2	21.6
	Rat #4	16.8	12.4		10.8	19.6		24.4	7.2		7.6	25.6		15.6	14.7
	Rat #5	19.1	9.1		14.6	15.2		7.9	16.2		4.6	18		17.1	8.8
	Rat #6	23.5	2.8		12.9	17.4		14.3	12.5		4.6	20		7.6	16.9
	Rat #7	17.4	13.6		16.9	13.6		19.5	14.3		5.5	28		25.1	8.1
	Rat #8	22.4	14.8		15.9	21.2		8.2	21.4		12.8	27		10.7	20.8
