# Supplementary material for: GPRC6A as a novel kokumi receptor responsible for enhanced taste preferences by ornithine
Source: eLife. 2025 May 1;13:RP101629. doi: 10.7554/eLife.101629 (PMC12045618; doi:10.7554/eLife.101629)
Supplement: Figure 3—source data 1. [file elife-101629-fig3-data1.xlsx]

## Sheet: Figure 3A,B
	Brief-exposure two bottle preference test: Fluid intake (g/10 min) with and without 1 mM ornithine (Orn)
	A				B
		Water				0.03M MSG
		- Orn	+ Orn			- Orn	+ Orn
	Rat #1	2	2.6			3.6	2.1
	Rat #2	2.4	1.7			1.2	5.3
	Rat #3	1.1	4			2.1	4.8
	Rat #4	3.5	2.2			2.8	3.5
	Rat #5	2.6	0.9			0.8	7
	Rat #6	1.9	3.3			2.4	6
	Rat #7	0.9	3			0.6	5.4

## Sheet: Figure 3C,D
	Brief-exposure two bottle preference test: Intake (g/10 min) of 0.03M MSG with and without 1 mM ornithine (Orn)
		Effects of GPRC6A antagonist, calindol.
	C				D
		0.03M MSG				0.03M MSG
		60 uM calindol				300 uM calindol
		- Orn	+ Orn			- Orn	+ Orn
	Rat #1	1.5	3.3			1.9	2.4
	Rat #2	0.5	4.6			1.4	2.3
	Rat #3	2.4	3.2			2.7	4
	Rat #4	1.7	3.9			4.1	2.7
	Rat #5	1	3.7			2.1	2.1
	Rat #6	2.5	3.5			4.8	3.7
	Rat #7	1.7	3.3			2.2	3.1

## Sheet: Figure 3E,F
		Brief-exposure two bottle preference test: Intake (g/10 min) of 0.03M MSG with and without 1 mM ornithine (Orn)
			Effects of GPRC6A antagonist, EGCG.
		E				F
			0.03M MSG				0.03M MSG
			30 uM EGCG				100 uM EGCG
			- Orn	+ Orn			- Orn	+ Orn
		Rat #1	2.5	3.8			3.3	2
		Rat #2	1	4.8			4.6	2.6
		Rat #3	2.3	4.6			4.1	3.9
		Rat #4	0.8	7.3			1.6	6.4
		Rat #5	2.1	3.7			1.5	4.1
		Rat #6	2.8	4.2			3.9	2.9
		Rat #7	0.7	4.2			2.5	1.9
