# Supplementary material for: GPRC6A as a novel kokumi receptor responsible for enhanced taste preferences by ornithine
Source: eLife. 2025 May 1;13:RP101629. doi: 10.7554/eLife.101629 (PMC12045618; doi:10.7554/eLife.101629)
Supplement: Figure 4—source data 1. [file elife-101629-fig4-data1.xlsx]

## Sheet: Figure 4A-D
	Two bottle preference test: Intake (g/10 min) of 0.03M MSG with and without 1 mM ornithine (Orn)
		Effects of sham operations (Sham Op) and chorda tympani transection (xCT)
	A	Before Sham Op			B	After Sham Op
		MSG				MSG
		- Orn	+ Orn			- Orn	+ Orn
	Rat #1	11.3	25.4			13.9	20.3
	Rat #5	6.4	27.1			8.7	27.1
	Rat #6	2	28.6			9	26.3
	Rat #8	9.8	19.7			12.5	25.2
	C	Before CT Cut (xCT)			D	After CT Cut (xCT)
		MSG				MSG
		- Orn	+ Orn			- Orn	+ Orn
	Rat #2	5	26.9			20.4	16.3
	Rat #3	4.3	25.9			24.6	26.5
	Rat #4	5.9	24.5			16.3	5.4
	Rat #7	11.3	26.1			17.5	20.1
