# Supplementary material for: GPRC6A as a novel kokumi receptor responsible for enhanced taste preferences by ornithine
Source: eLife. 2025 May 1;13:RP101629. doi: 10.7554/eLife.101629 (PMC12045618; doi:10.7554/eLife.101629)
Supplement: Figure 5—source data 1. [file elife-101629-fig5-data1.xlsx]

## Sheet: Figure 5D
	D	Nerve respooses to five concentrations of ornithine
		0.3mM	1mM	3mM	10mM	30mM
	Rat #1	0.19	0.15	0.2	0.24	0.59
	Rat #2	0.04	0.12	0.09	0.12	0.41
	Rat #3	0.05	0.04	0.08	0.32	0.63
	Rat #4	0.02	0.11	0.06	0.18	0.33
	MSG
	MSGO
	MSGamiloride
	MSGOamiloride

## Sheet: Figure 5E
	E	Nerve responses to 0.03M MSG with and without 1mM ornithine in water and in 0.01mM amiloride.
		0.03M MSG			0.03M MSG
		- Orn	+ Orn		- Orn	+ Orn
		in water			in amiloride
	Rat #1	1.9	3.06		1.29	2.46
	Rat #2	1.88	2.17		1.13	1.53
	Rat #3	1.24	2.06		0.47	1.35
	Rat #4	1.88	2.14		0.27	0.47
	Rat #5	1.76	2.31		0.59	1.05

## Sheet: Figure 5F
	F	Effects of calindol on nerve responses to 0.03M MSG and 1mM ornithine (Orn).
		0.03M MSG
		- Orn	+ Orn	+ Orn
		- calindol	- calindol	+ calindol
	Rat #1	1.63	2.75	2.17
	Rat #2	1.41	1.85	1.36
	Rat #3	1.56	2.42	1.7
	Rat #4	2.12	3.12	2.12
